# Supplementary material for: Improved Route to Linear Triblock Copolymers by Coupling with Glycidyl Ether-Activated Poly(ethylene oxide) Chains
Source: MDPI journal article supplement (doi:10.3390/polym15092128), 2023-04-29
Supplement: s1 [file s1]

---

## Supplementary Materials

## Table of Contents

|                                                                                          |    |
|------------------------------------------------------------------------------------------|----|
| Utilization of the Blocking Effect .....                                                 | 2  |
| Additional NMR Spectra .....                                                             | 3  |
| Comparison of Characteristic Signals in $^1\text{H}$ -NMR Spectra .....                  | 7  |
| Comparison of Proton Numbers .....                                                       | 8  |
| Full GPC Traces .....                                                                    | 8  |
| DSC of EmPEO <sub>1.9</sub> .....                                                        | 11 |
| Exemplary Photo of a PI <sub>x</sub> PS <sub>y</sub> AmPEO <sub>1.9</sub> Membrane ..... | 11 |
| Additional 2D SAXS Patterns .....                                                        | 12 |
| Details Concerning Fits to Radially Averaged SAXS Data .....                             | 13 |
| Sample Preparation by Cryo-Ultramicrotomy .....                                          | 14 |
| References .....                                                                         | 14 |

### Utilization of the Blocking Effect

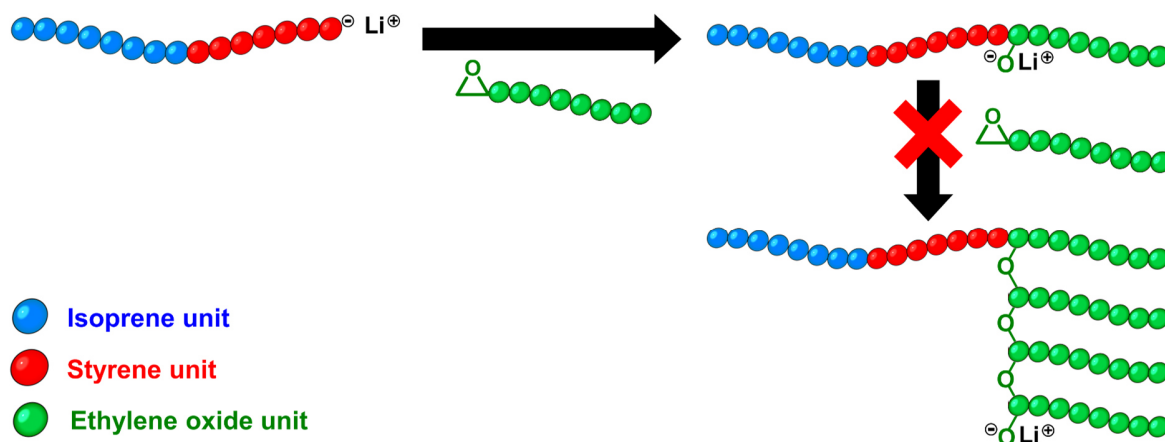

**Scheme S1.** Illustration of the utilization of the blocking effect for single EmPEO<sub>z</sub> chain attachment to the PI<sub>x</sub>PS<sub>y</sub><sup>-</sup> anion with Li<sup>+</sup> as counterion due to the strong O-Li affinity.

## Additional NMR Spectra

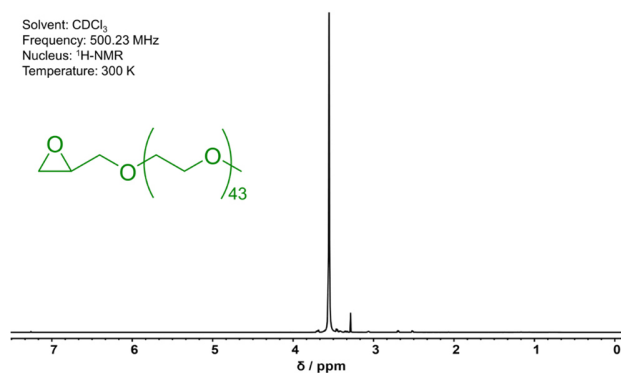

**Figure S1.** <sup>1</sup>H-NMR spectrum of EmPEO<sub>1.9</sub>.

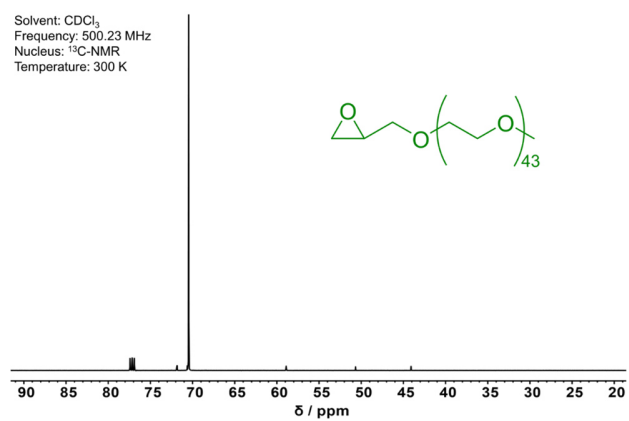

**Figure S2.** <sup>13</sup>C-NMR spectrum of EmPEO<sub>1.9</sub>.

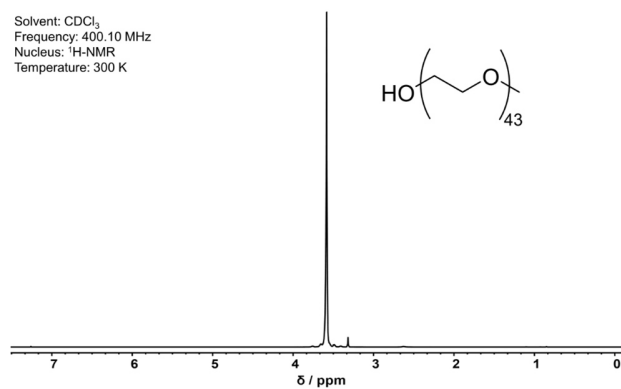

**Figure S3.** <sup>1</sup>H-NMR spectrum of mPEO<sub>1.9</sub>.

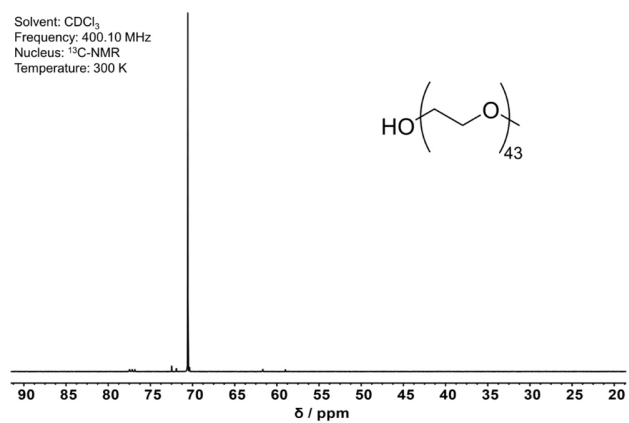

**Figure S4.** <sup>13</sup>C-NMR spectrum of mPEO<sub>1.9</sub>.

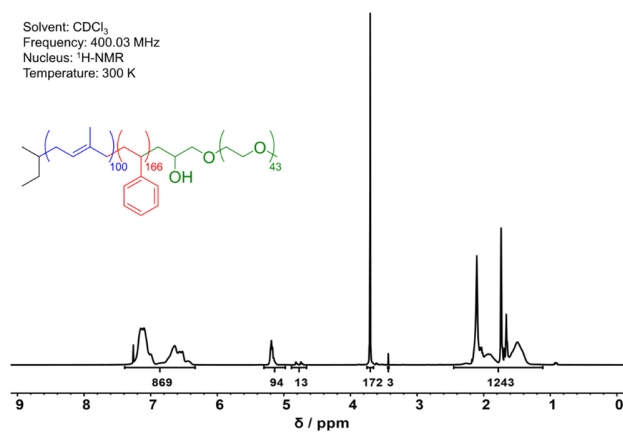

**Figure S5.** <sup>1</sup>H-NMR spectrum of PI<sub>6.8</sub>PS<sub>17.3</sub>AmPEO<sub>1.9</sub>.

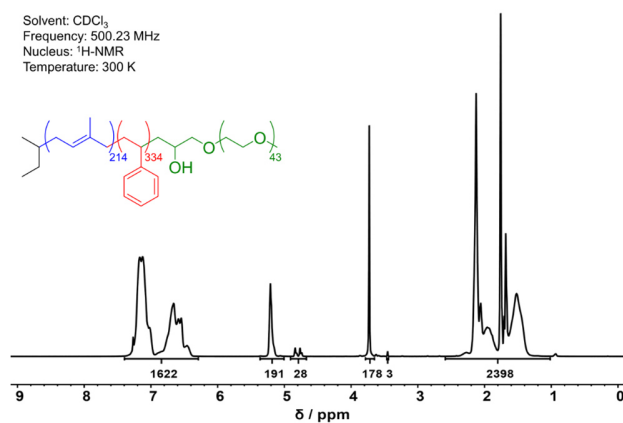

**Figure S6.** <sup>1</sup>H-NMR spectrum of PI<sub>14.6</sub>PS<sub>34.8</sub>AmPEO<sub>1.9</sub>.

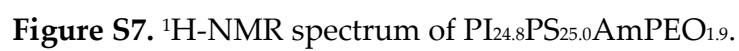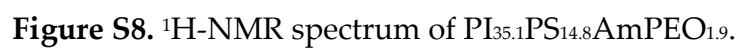

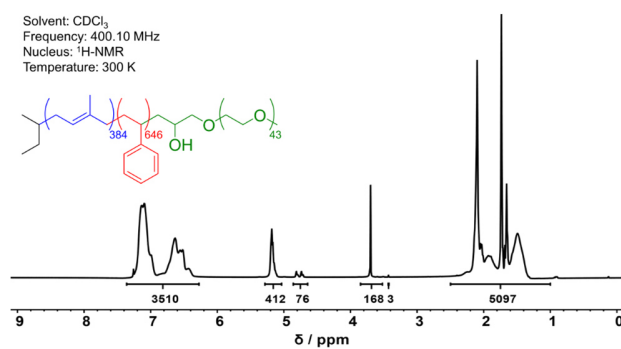

**Figure S9.** <sup>1</sup>H-NMR spectrum of PI<sub>26.1</sub>PS<sub>67.3</sub>AmPEO<sub>1.9</sub>.

## Comparison of Characteristic Signals in <sup>1</sup>H-NMR Spectra

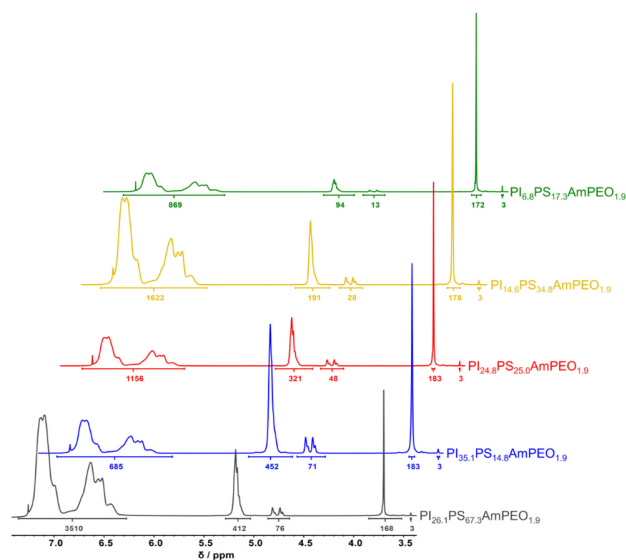

**Figure S10.** Comparison of the characteristic signals in the <sup>1</sup>H-NMR spectra of the synthesized PI<sub>x</sub>PS<sub>y</sub>AmPEO<sub>1.9</sub>.

## Comparison of Proton Numbers

**Table S1.** Comparison of the number of protons determined from  $^1\text{H}$ -NMR integrals of the individual polymer blocks of the synthesized  $\text{PI}_x\text{PS}_y\text{AmPEO}_{1.9}$  (cf. **Figure S10.**).

| Polymer                                              | $^1\text{H}_{1,4-\text{PI}_x}$ | $^1\text{H}_{3,4-\text{PI}_x}$ | $^1\text{H}_{\text{PS}_y}$ | $^1\text{H}_{\text{PEO}_{1.9}}$ |
|------------------------------------------------------|--------------------------------|--------------------------------|----------------------------|---------------------------------|
|                                                      | integral                       | integral                       | integral                   | integral                        |
| $\text{PI}_{6.8}\text{PS}_{17.3}\text{AmPEO}_{1.9}$  | 94                             | 13                             | 869                        | 172                             |
| $\text{PI}_{14.6}\text{PS}_{34.8}\text{AmPEO}_{1.9}$ | 191                            | 28                             | 1622                       | 178                             |
| $\text{PI}_{24.8}\text{PS}_{25.0}\text{AmPEO}_{1.9}$ | 321                            | 48                             | 1156                       | 183                             |
| $\text{PI}_{35.1}\text{PS}_{14.8}\text{AmPEO}_{1.9}$ | 452                            | 71                             | 685                        | 183                             |
| $\text{PI}_{26.1}\text{PS}_{67.3}\text{AmPEO}_{1.9}$ | 412                            | 76                             | 3510                       | 168                             |

## Full GPC Traces

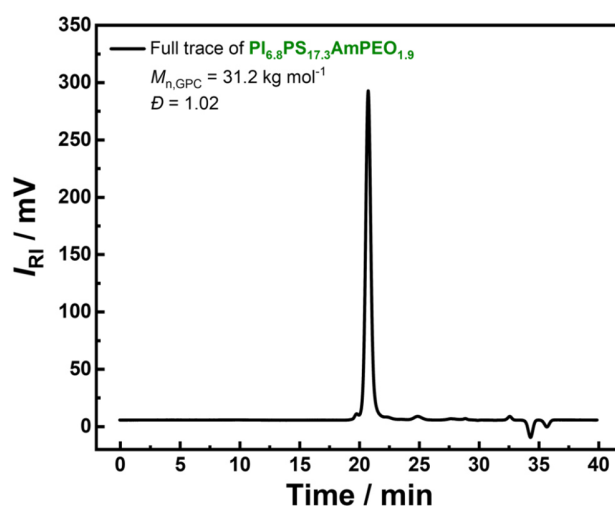

**Figure S11.** Full GPC trace of  $\text{PI}_{6.8}\text{PS}_{17.3}\text{AmPEO}_{1.9}$ .



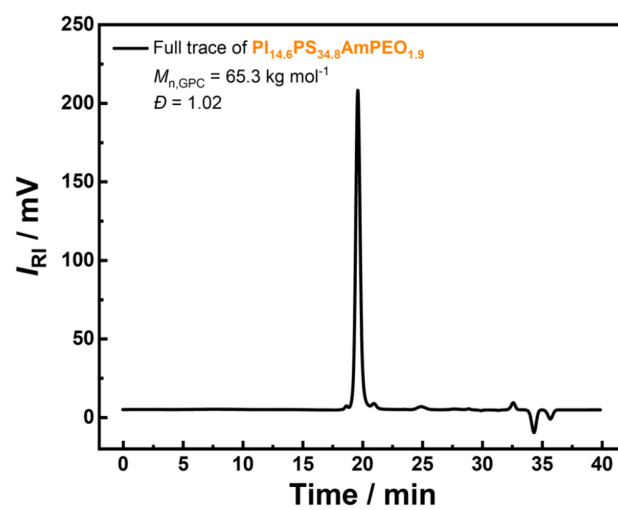

**Figure S12.** Full GPC trace of  $\text{PI}_{14.6}\text{PS}_{34.8}\text{AmPEO}_{1.9}$ .

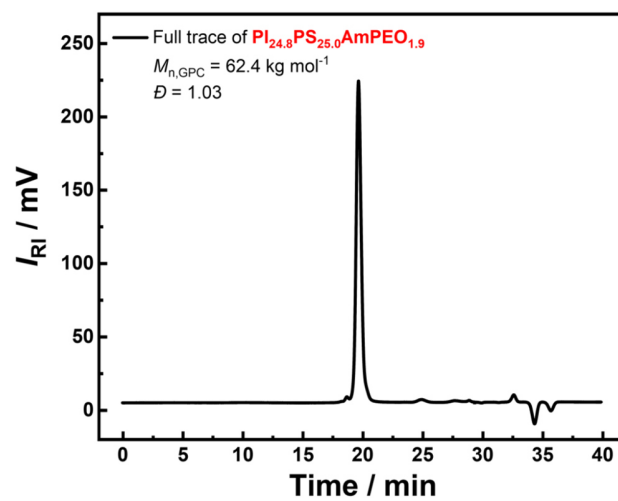

**Figure S13.** Full GPC trace of  $\text{PI}_{24.8}\text{PS}_{25.0}\text{AmPEO}_{1.9}$ .

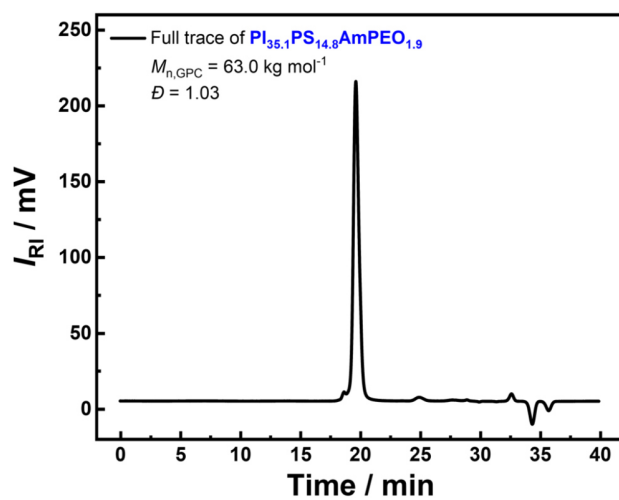

**Figure S14.** Full GPC trace of  $\text{PI}_{35.1}\text{PS}_{14.8}\text{AmPEO}_{1.9}$ .

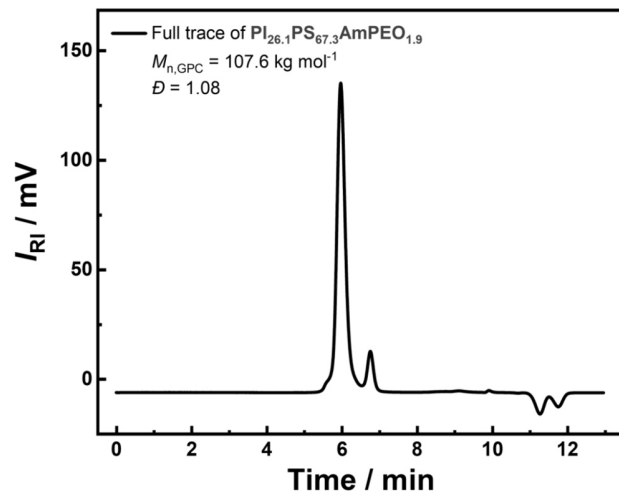

**Figure S15.** Full GPC trace of  $\text{PI}_{26.1}\text{PS}_{67.3}\text{AmPEO}_{1.9}$ .

## DSC of EmPEO<sub>1.9</sub>

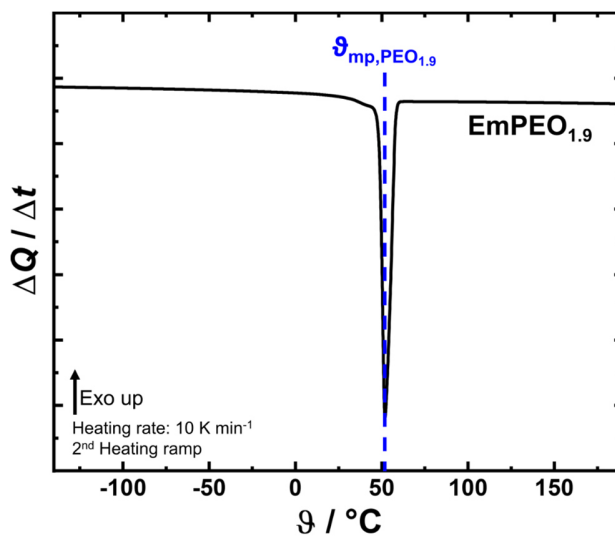

**Figure S16.** DSC measurement of EmPEO<sub>1.9</sub>.

## Exemplary Photo of a PI<sub>x</sub>PS<sub>y</sub>AmPEO<sub>1.9</sub> Membrane

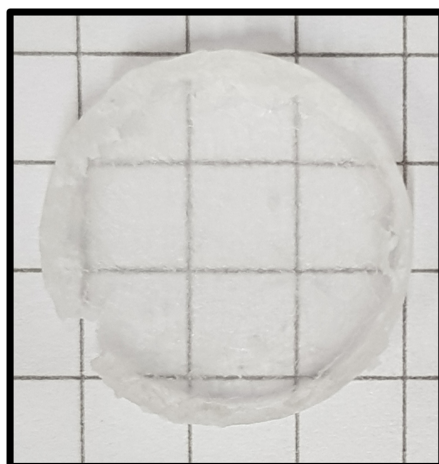

**Figure S17.** Exemplary photo of a colorless and transparent PI<sub>x</sub>PS<sub>y</sub>AmPEO<sub>1.9</sub> membrane cast from THF.

## Additional 2D SAXS Patterns

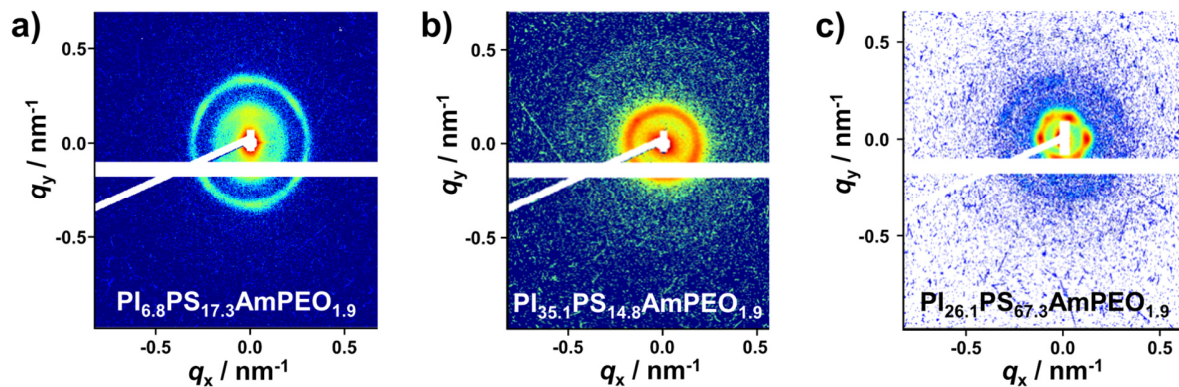

**Figure S18.** 2D SAXS patterns obtained at room temperature from the membrane in as-cast condition with a sample diameter of 2 mm of the synthesized  $\text{PI}_{6.8}\text{PS}_{17.3}\text{AmPEO}_{1.9}$ ,  $\text{PI}_{35.1}\text{PS}_{14.8}\text{AmPEO}_{1.9}$  and  $\text{PI}_{26.1}\text{PS}_{67.3}\text{AmPEO}_{1.9}$ .

## Details Concerning Fits to Radially Averaged SAXS Data

The radially averaged data was fit with the program scatter [1,2]. Here the decoupling approximation is used which means the scattering curve is approximated as the sum of form and structure factor. This approach is valid if the particle size distribution is narrow and the spatial distribution is independent of the size distribution. Furthermore, for cylinders and lamellae the longitudinal contribution (length parallel to cylinder axis or normal to the lamella) can be decoupled as well, if it is much greater than the cross-sectional contribution, which in general is the case for mesoscopically ordered materials.

For a system of polydisperse particles ( $b_1$ ) distributed in a second phase ( $b_2$ ) with sharp interfaces the scattering per unit volume is given by:

$$I(q) = (b_1 - b_2)\rho_N(\langle F^2(q) \rangle + \langle F(q) \rangle^2[\langle Z(q) \rangle - 1])$$

With  $F(q)$  being the scattering amplitude of the particle form,  $\rho_N$  the number density of particles and with  $Z(q)$  as the lattice factor which describes the spatial distribution of the particles. The angular brackets signify an average for either the size distribution with  $F(q)$  or the spatial distribution with  $Z(q)$ . The lattice factor contains the symmetry related extinction rules for a given lattice as well as a factor for lattice disorder and the peak shape. For more details see [1] and [2].

## Sample Preparation by Cryo-Ultramicrotomy

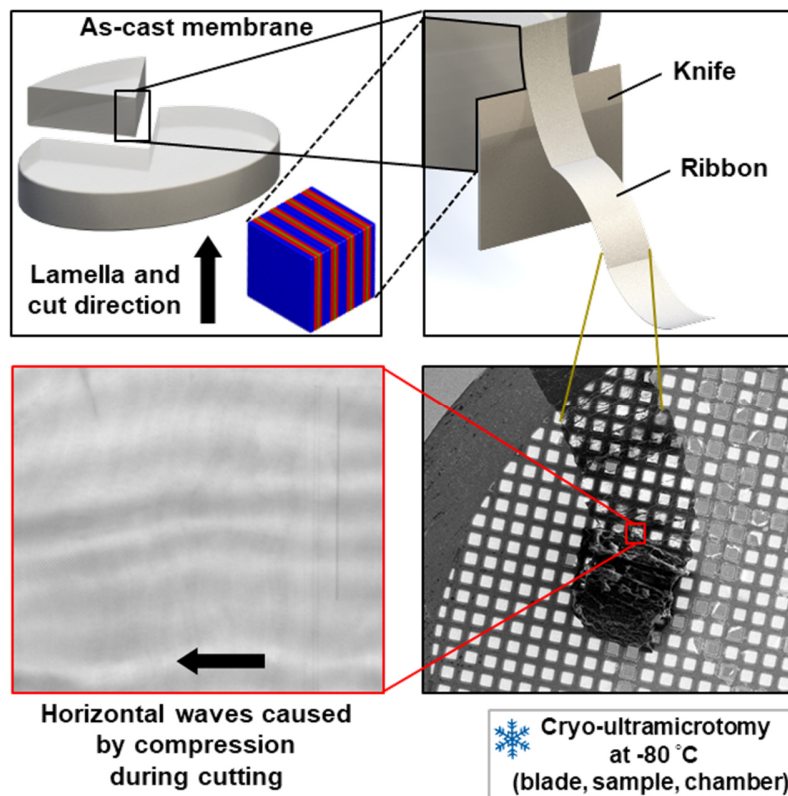

**Scheme S2.** Procedure of sample preparation by cryo-ultramicrotomy as well as sample placement onto the grid.

## References

1. Förster, S.; Timmann, A.; Konrad, M.; Schellbach, C.; Meyer, A.; Funari, S.S.; Mulvaney, P.; Knott, R. Scattering Curves of Ordered Mesoscopic Materials. *The Journal of Physical Chemistry B* **2005**, *109*, 1347–1360.
2. Förster, S.; Fischer, S.; Zielske, K.; Schellbach, C.; Sztucki, M.; Lindner, P.; Perlich, J. Calculation of scattering-patterns of ordered nano- and mesoscale materials. *Advances in Colloid and Interface Science* **2011**, *163*, 53–83.
